# Supplementary material
Source: PubMed Central journal article supplement (PMC2583542)
Supplement: EC.00204-08_1.pdf [file EC.00204-08_1.pdf]

**SUPPLEMENTAL TABLE S1****Proteins co-purify with MIX tagged complex and are considered as non-specific contaminants of TAP tag purifications**

| <b>Protein_Name</b> | <b>Description</b>                                                                   |
|---------------------|--------------------------------------------------------------------------------------|
| Tb927.6.3740        | heat shock 70 kDa protein, mitochondrial precursor, putative                         |
| Tb11.02.4150        | PPDK pyruvate phosphate dikinase                                                     |
| Tb11.02.5500        | glucose-regulated protein 78, putative                                               |
| Tb927.6.4280        | GAPDH glyceraldehyde 3-phosphate dehydrogenase, glycosomal                           |
| Tb927.7.210         | proline oxidase, putative                                                            |
| Tb10.389.0690       | mitochondrial carrier protein, putative                                              |
| Tb927.3.1840        | 3-oxo-5-alpha-steroid 4-dehydrogenase, putative                                      |
| Tb09.160.4310       | GDH 28G16.445 glutamate dehydrogenase                                                |
| Tb927.7.7420        | ATP synthase alpha chain, mitochondrial precursor                                    |
| Tb10.70.5670        | TEF1 elongation factor 1-alpha                                                       |
| Tb10.61.1820        | mitochondrial carrier protein, putative                                              |
| Tb11.01.3110        | heat shock protein 70                                                                |
| Tb11.02.0750        | TCP-1-zeta t-complex protein 1, zeta subunit, putative                               |
| Tb10.61.2070        | RPS2 40S ribosomal protein S2, putative                                              |
| Tb927.2.3030        | 10C8.315 ATP-dependent Clp protease subunit, heat shock protein 78 (HSP78), putative |
| Tb10.70.2650        | elongation factor 2                                                                  |
| Tb927.3.1380        | TAP102 ATP synthase beta chain, mitochondrial precursor                              |
| Tb10.70.3290        | DHH1 ATP-dependent DEAD-box RNA helicase, putative                                   |
| Tb927.8.7530        | 3,2-trans-enoyl-CoA isomerase, mitochondrial precursor, putative                     |
| Tb09.160.3270       | 1L12.525 eukaryotic initiation factor 4a, putative                                   |
| Tb927.5.3800        | glutamine hydrolysing (not ammonia-dependent) carbomoyl phosphate synthase, putative |

**SUPPLEMENTAL TABLE S2****Proteins co-purify with cyt c oxidase tagged complexes and are considered as non-specific contaminants of TAP tag purifications**

| <b>Protein_Name</b> | <b>GeneDB_Annotation</b>                                          |
|---------------------|-------------------------------------------------------------------|
| Tb927.6.4280        | GAPDH glyceraldehyde 3-phosphate dehydrogenase, glycosomal        |
| Tb927.6.3740        | heat shock 70 kDa protein, mitochondrial precursor, putative      |
| Tb927.5.1060        | TAP067 mitochondrial processing peptidase, beta subunit, putative |
| Tb927.3.1840        | 3-oxo-5-alpha-steroid 4-dehydrogenase, putative                   |
| Tb927.3.1380        | TAP102 ATP synthase beta chain, mitochondrial precursor           |
| Tb11.02.4150        | PPDK pyruvate phosphate dikinase                                  |
| Tb11.01.3110        | heat shock protein 70                                             |
| Tb10.70.5670        | TEF1 elongation factor 1-alpha                                    |
| Tb10.70.5110        | mMDH mitochondrial malate dehydrogenase                           |
| Tb10.61.1820        | mitochondrial carrier protein, putative                           |
| Tb10.389.0690       | mitochondrial carrier protein, putative                           |
| Tb09.211.3560       | glk1 gk glycerol kinase, glycosomal                               |
| Tb09.160.4310       | GDH 28G16.445 glutamate dehydrogenase                             |

**SUPPLEMENTAL TABLE S3**

**Proteins identified variably in TAP-tagged complexes indicating that they associate transiently with cyt c complex or they may not be part of the complex**

| <i>T.brucei</i> gene | TM | MW <sup>b</sup> | TAP MIX | TAP COXIV | TAP COXV | TAP Tb2320 | TAP Tb1900 | Possible function/similarity                |
|----------------------|----|-----------------|---------|-----------|----------|------------|------------|---------------------------------------------|
| Tb927.3.750          | 1  | 37.8            | 1       | √         | √        | √          | 1          | Hypothetical protein; conserved; SET domain |
| Tb927.3.1410*        | NI | 19.3            | ND      | √         | √        | √          | 1          | Cyt c oxidase subunit VII; Tryp specific    |
| Tb927.7.5260         | NI | 22.7            | ND      | 1         | √        | √          | ND         | Hypothetical protein; Tryp specific         |
| Tb927.8.6080         | NI | 38.1            | ND      | 1         | √        | √          | √          | Hypothetical protein; conserved             |
| Tb09.211.4400        | NI | 48.9            | ND      | √         | √        | 1          | ND         | Hypothetical protein; Tryp specific         |
| Tb10.70.0625*        | 1  | 12.3            | 1       | √         | √        | √          | ND         | Hypothetical protein; Tryp specific         |
| Tb10.70.7840         | 1  | 56.9            | 1       | √         | √        | √          | ND         | Cholin dehydrogenase                        |
| Tb11.01.5390         | 1  | 36.1            | ND      | 1         | √        | √          | √          | DnaJ chaperon                               |
| Tb11.02.1440         | 2  | 36.3            | ND      | ND        | 1        | √          | 1          | Hypothetical protein; conserved             |
| Tb11.02.2280         | NI | 40              | 1       | ND        | √        | 1          | 1          | Surfeit 1                                   |
| Tb11.02.2480         | NI | 25.8            | ND      | 1         | 1        | √          | 1          | Hypothetical protein; Tryp specific         |
| Tb927.2.3180         | NI | 114             | 1       | ND        | ND       | ND         | ND         | Pet 309; cox translation activator          |
| Tb927.4.4620*        | 1  | 18.7            | ND      | 1         | 1        | 1          | ND         | Cyt c oxidase subunit VIII; Tryp specific   |
| Tb10.100.0160*       | NI | 19.2            | ND      | ND        | ND       | 1          | ND         | Cyt c oxidase subunit VI                    |
| Tb10.6k15.2180*      | 1  | 13.8            | ND      | ND        | ND       | 1          | ND         | Cyt c oxidase subunit IX; Tryp specific     |
| Tb10.70.4380         | 1  | 27              | ND      | 1         | 1        | 1          | ND         | Cox 11; cox assembly factor                 |
| Tb11.01.3780         | 8  | 43.5            | 1       | ND        | 1        | 1          | ND         | Cox 15; cox assembly factor                 |

TM – indicates number of predicted transmembrane domains calculated by TMHMM 2.0 software; NI – no transmembrane domain identified

<sup>b</sup> In kDa.

√ – indicates that the number of unique peptides detected with each of the tandem affinity purification-tagged constructs is higher than 2.

ND – protein has not been detected

\* – proteins identified in *L. tarentolae* and *C.fasciculata* cyt c oxidase complexes (Horváth et al., 2000, Speijer et al., 1996)

**SUPPLEMENTAL TABLE S4**

**Genomic analysis of mitochondrial components of cytochrome c oxidase from *T. brucei*. Identification of homologous sequences in eukaryotic organisms.**

| <i>Homo sapiens</i>        | <i>Saccharomyces cerevisiae</i> | <i>Arabidopsis thaliana</i>                        | <i>Trypanosoma brucei</i> | Homology | GeneDB annotation | Presence in tagged cytochrome c oxidase complexes |
|----------------------------|---------------------------------|----------------------------------------------------|---------------------------|----------|-------------------|---------------------------------------------------|
| <b>1. core subunits</b>    |                                 |                                                    |                           |          |                   |                                                   |
| COI                        | COI                             | AtMg01360                                          | COI                       |          |                   |                                                   |
| COII                       | COII                            | AtMg00160                                          | COII                      |          |                   |                                                   |
| COIII                      | COII                            | AtMg00730                                          | COIII                     |          |                   |                                                   |
| COXIV                      | COX5                            | -                                                  | Tb927.4.4620              | +        | COVIII            | √                                                 |
| COXVa                      | COX6                            | -                                                  | -                         |          |                   |                                                   |
| COXVb                      | COX4                            | AT3g15640,<br>At1g80230<br>At3g62400;<br>At2g47380 | -                         |          |                   |                                                   |
| -                          | -                               | At4g37830                                          | -                         |          |                   |                                                   |
| COXVIa                     | COX13                           | AT1g22450                                          | -                         |          |                   |                                                   |
| COXVIb                     | COX12                           | -                                                  | Tb10.100.0160             | +        | COVI              | √                                                 |
| COXVIc                     | COX9                            | -                                                  | -                         |          |                   |                                                   |
| COXVIIa                    | COX7                            | -                                                  | -                         |          |                   |                                                   |
| COXVIIb                    | -                               | -                                                  | -                         |          |                   |                                                   |
| COXVIIc                    | COX8                            | -                                                  | -                         |          |                   |                                                   |
| COXVIII                    | -                               | -                                                  | -                         |          |                   |                                                   |
| -                          | -                               | -                                                  | Tb927.4.4100              |          | trCOIV            | √√                                                |
| -                          | -                               | -                                                  | Tb09.160.1820             |          | COV               | √√                                                |
| -                          | -                               | -                                                  | Tb927.3.1410              |          | COVII             | √                                                 |
| -                          | -                               | -                                                  | Tb10.6k15.2180            |          | COIX              | √                                                 |
| -                          | -                               | -                                                  | Tb11.01.4702              |          | COX 10            | √√                                                |
| -                          | -                               | -                                                  | Tb10.70.1890              |          | HP                | √√                                                |
| -                          | -                               | -                                                  | Tb09.211.4740             |          | HP                | √√                                                |
| -                          | -                               | -                                                  | Tb09.211.1900             |          | HP                | √√                                                |
| -                          | -                               | -                                                  | Tb927.7.6990              |          | HP                | √√                                                |
| -                          | -                               | -                                                  | Tb11.01.1900              |          | HP                | √√                                                |
| -                          | -                               | -                                                  | Tb11.46.0006              |          | HP                | √√                                                |
| <b>2. assembly factors</b> |                                 |                                                    |                           |          |                   |                                                   |
| Surfeit1                   | SHY I                           | At3g17910                                          | Tb11.02.2280              | ++       | HP                | √                                                 |

|                                             |                 |                        |               |    |                                       |    |
|---------------------------------------------|-----------------|------------------------|---------------|----|---------------------------------------|----|
| SCO1/SCO2                                   | SCO1/SCO2       | AT3g08950              | Tb09.160.1140 | ++ | electron transport protein SCO1/SCO2  | √√ |
|                                             |                 |                        | Tb09.211.0510 | ++ | cytochrome c oxidase assembly factor  | -  |
|                                             |                 |                        | Tb927.1.1580  | ++ | electron transport protein SCO1/2,    | -  |
| COX10                                       | COX10           | At2g44520              | Tb927.5.1310  | ++ | protoheme IX farnesyltransferase      | -  |
| COX11                                       | COX11           | AT1g02410              | Tb10.70.4380  | ++ | cytochrome C oxidase assembly protein | √  |
| COX15                                       | COX15           | AT5g56090              | Tb11.01.3780  | ++ | cytochrome oxidase assembly protein   | √  |
| AAH01702                                    | COX16           | AT4g14145              | -             |    |                                       |    |
| COX17                                       | COX17           | At1g53030              | Tb927.3.2650  | +  | cytochrome c oxidase copper chaperone | -  |
| OXA                                         | COX18,OXA1      | At5g62050              | Tb11.02.4020  | ++ | HP                                    | -  |
|                                             |                 |                        | Tb09.211.1850 | ++ | HP                                    | -  |
| COX19                                       | COX19           | AT1G66590              | Tb10.61.0510  | ++ | HP                                    | -  |
| NP_077276,<br>Q9BUK0<br>AAH47722,<br>Q86WW8 | COX23,<br>COX17 | At1g02160              | -             |    |                                       |    |
|                                             | PET191          | -                      | -             |    |                                       |    |
|                                             |                 | PPRC protein<br>family |               |    |                                       |    |
| LRPPRC                                      | PET309          |                        | Tb927.2.3180  | ++ |                                       | √  |
| -                                           | PET111          | -                      | -             |    |                                       |    |
| -                                           | PET122          | -                      | -             |    |                                       |    |
| -                                           | PET117          | -                      | -             |    |                                       |    |
| -                                           | PET100          | AT4g14615              | -             |    |                                       |    |
| -                                           | -               | AT4g37830              | -             |    |                                       |    |
| -                                           | COX20           | -                      | -             |    |                                       |    |
| -                                           | COX14           | -                      | -             |    |                                       |    |

- homologous sequence has not been identified

√√- identified in all four TAP tags experiments,

√- identified in less than four TAP tags experiments,

+ - *E*-value higher than 1e-03

++ - *E*-value lower than 1e-03

HP - hypothetical protein

**Supplemental figure S1**  
**Schematic presentation of the methods used for purification of tagged complexes.**

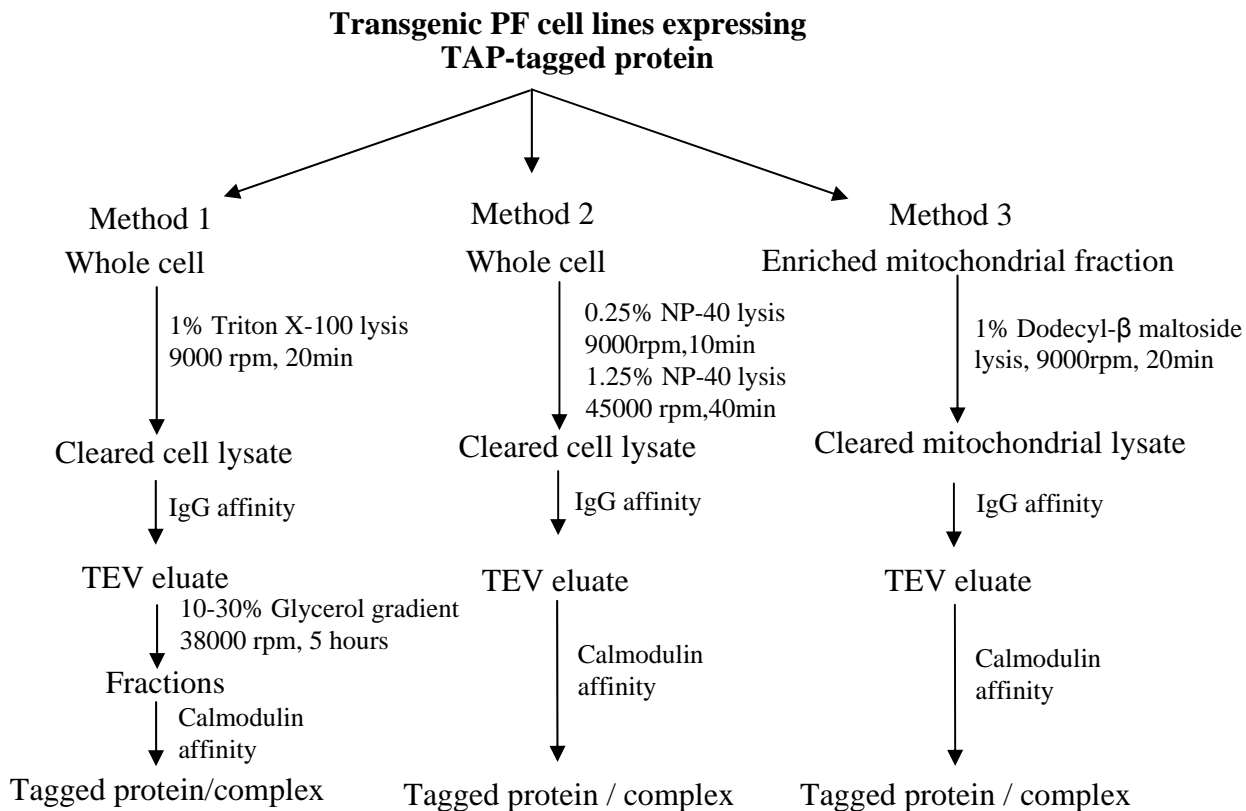

**Supplemental figure S2**  
**Immunofluorescence assay of expressed TAP-tagged proteins.**

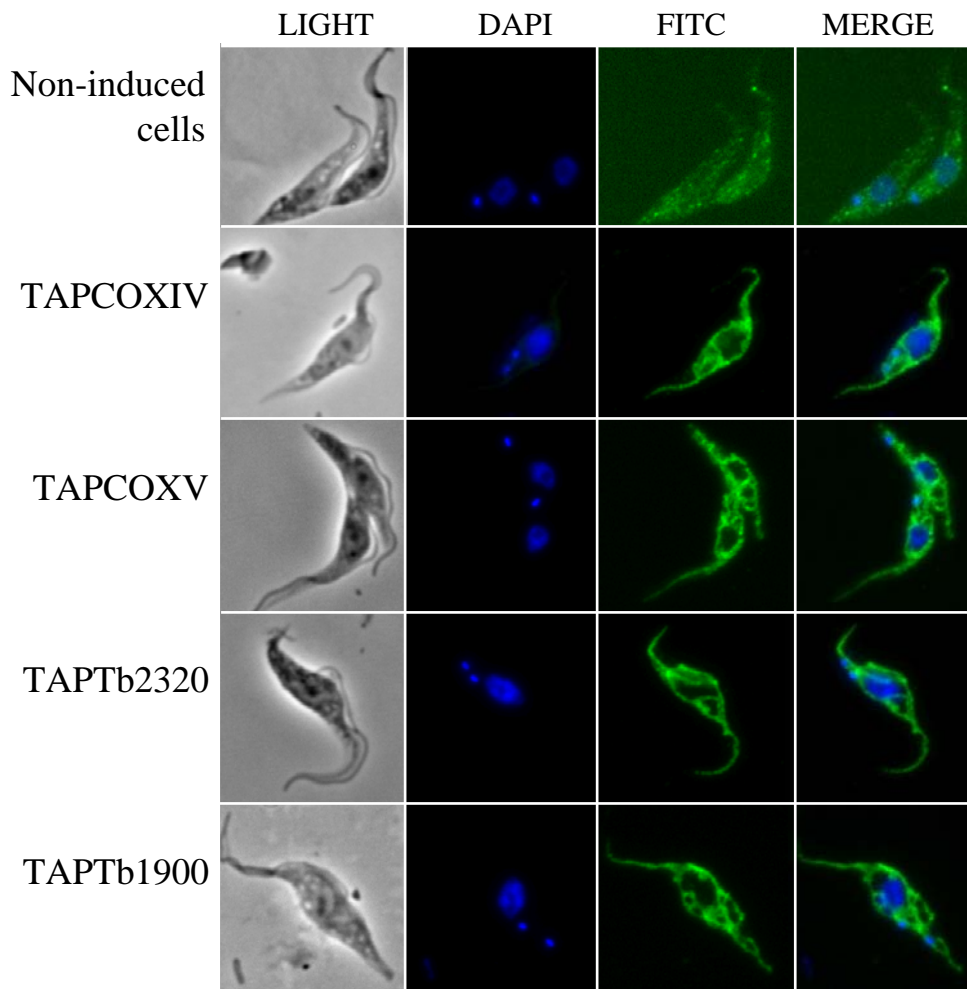

**Immunofluorescence assay.** Subcellular localization of the expressed tagged proteins within the cell was determined by immunofluorescence assay (IFA) using anti-*myc* mAb (Invitrogen). Briefly, the cells were fixed with 4% formaldehyde, permeabilized with 0.2% Triton X-100, blocked with 5% FBS, and incubated with anti-*myc* antibody at 1:100 dilution. After washing the cells were incubated with anti-mouse FITC conjugated antibody (1:250 dilution) (SIGMA), washed and treated with DAPI stain (4,6-diamidino-2-phenylindole) to visualize DNA. Phase contrast image of the cells and their fluorescence was captured with a Nikon fluorescence microscope equipped with camera and the appropriate filters.
